# Supplementary material for: Characterization of a major QTL for manganese accumulation in rice grain
Source: PubMed Central journal article supplement (PMC5735179; doi:10.1038/s41598-017-18090-7), 2017-12-18
Supplement: 41598_2017_18090_MOESM1_ESM.pdf [file 41598_2017_18090_MOESM1_ESM.pdf]

## **Title**

Characterization of a major QTL for manganese accumulation in rice grain

## **Authors**

Chaolei Liu, Guang Chen, Yuanyuan Li, Youlin Peng, Anpeng Zhang, Kai Hong, Hongzhen Jiang, Banpu Ruan, Bin Zhang, Shenglong Yang, Zhenyu Gao\* & Qian Qian\*

Table S1 Phenotypic variation of grain manganese (Mn) concentration in parents and RILs grown in Hangzhou and Hainan (2013).

| Trait<br>(mg/kg) | Parents                  |                          | RIL population     |                   | $H^2\%$ |       |
|------------------|--------------------------|--------------------------|--------------------|-------------------|---------|-------|
|                  | 93-11<br>(Mean $\pm$ SD) | PA64s<br>(Mean $\pm$ SD) | Mean $\pm$ SD      | Range             |         |       |
| Mn               | Hangzhou                 | 43.20 $\pm$ 2.24         | 60.42 $\pm$ 3.34** | 46.88 $\pm$ 13.11 | 70.66   | 30.67 |
|                  | Hainan                   | 24.29 $\pm$ 1.94         | 32.18 $\pm$ 1.92** | 28.37 $\pm$ 4.90  | 21.75   |       |

Note: \*\* indicates a 1% significant level compared to 93-11 according to the *t* test ( $n = 6$ ). Broad-sense heritability ( $H^2$ ) was calculated as described in Materials and Methods.

Table S2 Quantitative trait loci (QTLs) for grain Mn concentration in RIL population.

| QTL <sup>a</sup> | Chr. | Marker interval | Hangzhou         |                    |                   | Hainan           |                    |                   |
|------------------|------|-----------------|------------------|--------------------|-------------------|------------------|--------------------|-------------------|
|                  |      |                 | LOD <sup>b</sup> | R <sup>2</sup> (%) | Add. <sup>c</sup> | LOD <sup>b</sup> | R <sup>2</sup> (%) | Add. <sup>c</sup> |
| <i>qGMN1</i>     | 1    | SNP1-238~1-247  | 2.57             | 5.8                | 1.189             |                  |                    |                   |
| <i>qGMN2</i>     | 2    | SNP2-329~2-367  | 2.86             | 10.2               | 1.594             |                  |                    |                   |
| <i>qGMN3</i>     | 3    | SNP3-31~3-32    |                  |                    |                   | 4.13             | 3.4                | -2.414            |
| <i>qGMN4</i>     | 4    | SNP4-220~4-243  | 2.78             | 3.1                | -0.385            | 2.52             | 3.5                | -1.564            |
| <i>qGMN5</i>     | 5    | SNP5-211~5-225  | 3.92             | 4.8                | 1.115             |                  |                    |                   |
| <i>qGMN6.1</i>   | 6    | SNP6-31~6-32    | 2.98             | 3.1                | -0.170            |                  |                    |                   |
| <i>qGMN6.2</i>   | 6    | SNP6-149~6-180  | 2.68             | 9.4                | -1.756            | 3.95             | 13.5               | -5.708            |
| <i>qGMN7.1</i>   | 7    | SNP7-53~7-64    | 5.85             | 15.6               | -1.547            | 6.37             | 22.8               | -6.624            |
| <i>qGMN7.2</i>   | 7    | SNP7-152~7-199  | 2.67             | 6.0                | -1.204            | 2.82             | 7.3                | -5.320            |
| <i>qGMN8.1</i>   | 8    | SNP8-29~8-63    | 4.49             | 10.6               | -1.576            | 3.16             | 7.9                | -4.662            |
| <i>qGMN8.2</i>   | 8    | SNP8-103~8-116  |                  |                    |                   | 3.92             | 4.8                | -2.947            |
| <i>qGMN9</i>     | 9    | SNP9-9~9-28     | 2.93             | 6.6                | 1.239             |                  |                    |                   |

Note: <sup>a</sup> Detected QTLs are shown with the italic abbreviation of the trait and the chromosome number. <sup>b</sup> Threshold values of logarithm of odds (LOD)>2.50 are shown. <sup>c</sup> Additive effect (Add.) of the 93-11 allele.

Table S3 Primers for Insertion/deletion (InDel) markers and qRT-PCR in this study.

| Marker name         | Primer sequence (5'→3')    |                             |
|---------------------|----------------------------|-----------------------------|
|                     | Forward                    | Reverse                     |
| L6952               | GGGAGCCAAAACAGTAGCAG       | GCTGTGCCCACTAAGTTAGC        |
| L8286               | AACTCATGTGCAAGAAGGAG       | TGTTTATGCTATTATTAAGCAACCT   |
| L8397               | GCCTAAAGTATAAGGCAAATTAGA   | AAAGAGATGATGGTGGGAGT        |
| L8451               | TCCCATAATCTAGACAAGGG       | TAACATCACACGACAGTAC         |
| L8472               | GGTCCATCTTATTCAAGTTGG      | TACTCCGTATGCGTGGAACC        |
| L8691               | ACTAAGCATCACTTGTAGAG       | TGTTTCAAGCTAAATGCCAC        |
| L8728               | TCCCATAATCTAGACAAGGG       | TAACATCACACGACAGTAC         |
| L8798               | TCCGATGTTACAACCAAGAC       | TCCTCATCTCGGTTGCTCAG        |
| L8857               | TCCTCATCTCGGTTGCTCAG       | CTTTTCGCTAATTTGAACTTGT      |
| L8906               | CAAAATTTTCATGGCTTGAC       | TGTAGTCTTTGATGGAAAGCTC      |
| L8918               | CAATGTATATTTGACATAAACCAACA | CTTCCTTGCCCTGGAAGC          |
| L9020               | TGAGATGAGTGAAAGGGGATA      | TGAGTGATAAAAACAACCTGATAACAA |
| L9205               | GGAGCTTGTGGAGTATTACAT      | GGGCTCTTTGACATCGTC          |
| L9312               | AGGGTCCTCGTCTTCTTTTGA      | AGTCCTATCCAGATTGCCCTG       |
| RT- <i>OsNRAMP5</i> | CAGCAGCAGTAAGAGCAAGATG     | GTGCTCAGGAAGTACATGTTGAT     |
| RT- <i>Actin1</i>   | GACTCTGGTGATGGTGTGTCAGC    | GGCTGGAAGAGGACCTCAGG        |
| RT- <i>GFP</i>      | CCTACGGCAAGCTGACCCTG       | TGCTGCTTCATGTGGTCGGG        |
| RT- <i>GUS</i>      | TCCTTCATTTTCTTGGTTAGGACCC  | CGTCGGTTCTGTAACATATCATCATCA |

Table S4 The code, name, subspecies and haplotypes of *OsNRAMP5* promoter of rice varieties used in the present study.

| Code  | Cultivar name              | Subspecies                | OsNRAMP5 promoter haplotype |
|-------|----------------------------|---------------------------|-----------------------------|
| PA64s | PA64s                      | <i>Indica</i>             | I                           |
| NPB   | Nipponbare                 | <i>Japonica</i>           | I                           |
| WYJ7  | Wyunjing7                  | <i>Japonica</i>           | I                           |
| CCG   | Changchungu                | <i>Indica</i>             | I                           |
| 154   | OPALE                      | <i>Temperate Japonica</i> | I                           |
| 252   | Qiuguang                   | <i>Temperate Japonica</i> | I                           |
| 276   | Qiutianxiaoding            | <i>Temperate Japonica</i> | I                           |
| 563   | SAGC-7                     | <i>Admix</i>              | I                           |
| 736   | GANIGI                     | <i>Tropical Japonica</i>  | I                           |
| 992   | CNA-7BO11>33-13-6-1        | <i>Tropical Japonica</i>  | I                           |
| 993   | IR 63380-16                | <i>Tropical Japonica</i>  | I                           |
| 995   | RIZZOTTO 51-1              | <i>Temperate Japonica</i> | I                           |
| 1057  | T757                       | <i>Indica</i>             | I                           |
| 1199  | BOCAO                      | <i>Tropical Japonica</i>  | I                           |
| 93-11 | 93-11                      | <i>Indica</i>             | II                          |
| 71    | MELEKE                     | <i>Indica</i>             | II                          |
| 140   | IR 72967-12-2-3            | <i>Tropical Japonica</i>  | II                          |
| 166   | WAS 170-B-B-1-1            | <i>Indica</i>             | II                          |
| 167   | WAS 173-B-B-6-2-2          | <i>Indica</i>             | II                          |
| 271   | K24                        | <i>Indica</i>             | II                          |
| 447   | Chorofa                    | <i>Indica</i>             | II                          |
| 491   | Zhongyouzao81              | <i>Indica</i>             | II                          |
| 493   | IR77289-14-1-2             | <i>Indica</i>             | II                          |
| 498   | IR62266-42-6-2             | <i>Admix</i>              | II                          |
| 502   | 829                        | <i>Admix</i>              | II                          |
| 767   | NSIC RC9 (APO)             | <i>Indica</i>             | II                          |
| 871   | ORIONE                     | <i>Temperate Japonica</i> | II                          |
| 875   | UPL RI-7                   | <i>Admix</i>              | II                          |
| 1105  | Padi Ladang Ase Polo Komek | <i>Indica</i>             | II                          |
| TN1   | Taizhong1                  | <i>Indica</i>             | III                         |
| NJ6   | Nanjing6                   | <i>Indica</i>             | III                         |
| 565   | KCD1                       | <i>Indica</i>             | III                         |

Note: Most of the varieties are from 3K rice germplasm resources (<http://cgm.sjtu.edu.cn/3kricedb/>).

Table S5 Comparison of eleven traits between 93-11 and CSSL-*qGMN7.1* in Hangzhou (2015).

| Trait                     | 93-11          | CSSL- <i>qGMN7.1</i> |
|---------------------------|----------------|----------------------|
| Plant height (cm)         | 120.1 ± 2.6    | 121.6 ± 2.1          |
| Panicle length (cm)       | 24.8 ± 1.9     | 25.6 ± 1.5           |
| Primary branch number     | 10.8 ± 0.7     | 10.7 ± 0.9           |
| 1000-seed weight (g)      | 30.02 ± 1.61   | 29.86 ± 1.41         |
| Yield per plant (g)       | 35.9 ± 2.7     | 34.6 ± 1.8           |
| Spikelets per panicle     | 220.3 ± 27.9   | 216.3 ± 18.5         |
| Seed set                  | 89.6 ± 0.8     | 90.2 ± 1.2           |
| Productive tiller         | 8.3 ± 1.7      | 8.5 ± 2.1            |
| Heading date(d)           | 92 ± 2.6       | 91 ± 2.3             |
| Grain Mn conc. (mg/kg DW) | 32.26 ± 2.37   | 43.56 ± 3.79**       |
| Grain Cd conc. (µg/kg DW) | 204.24 ± 40.26 | 115.24 ± 12.06**     |

Phenotypes are presented as mean ± standard deviation. \*\* indicates a 1% significant level compared to 93-11 according to the *t* test (*n* = 6).

**Fig. S1**

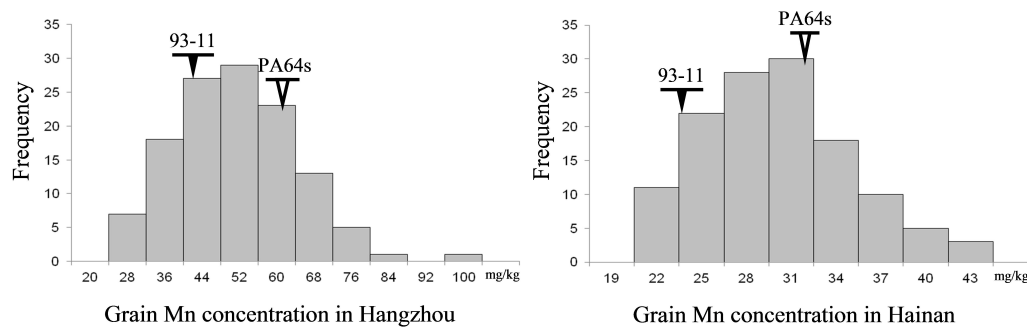

Fig.S1 Frequency distributions for grain Mn concentration in RILs in Hangzhou (2013) and Hainan (2013). Arrowheads indicate the means of 93-11 and PA64s and horizontal bars represent standard deviation of each cultivar ( $n = 6$ ).

**Fig.S2**

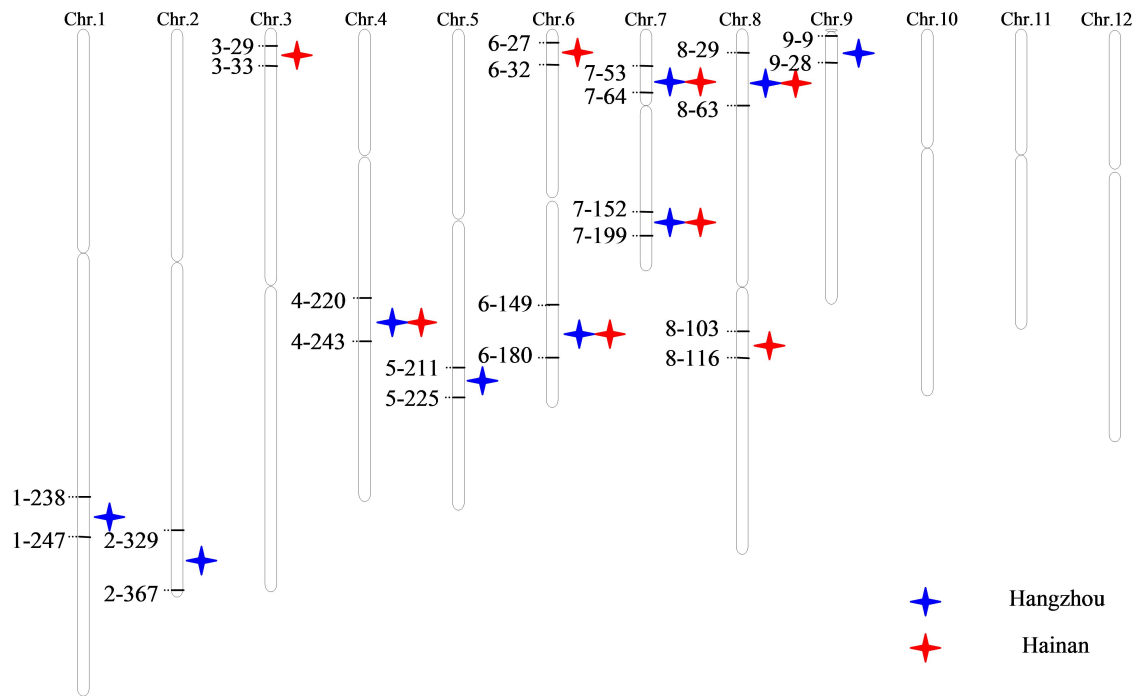

Fig.S2 Chromosomal locations of QTLs for grain Mn concentration detected in RILs. The number on the left of each chromosome is the SNP marker interval. The blue star represents phenotype collected in Hangzhou (2013) and the red one that in Hainan (2013).



**Fig.S3**

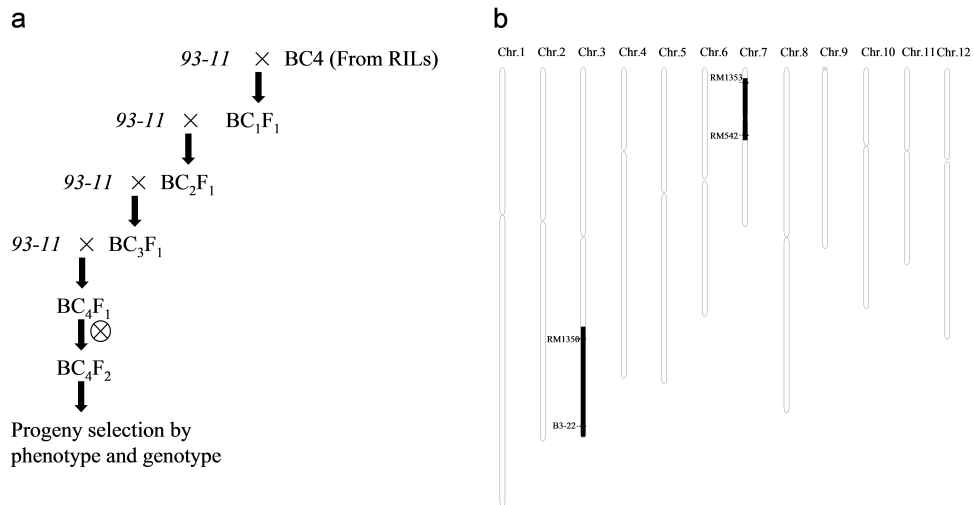

Fig.S3 Breeding scheme for the development of CSSL-*qGMN7.1* and its genetic background. (a) BC4, a line carrying segments of PA64s at *qGMN7.1* locus from RILs, was continuously backcrossed with 93-11. The CSSL-*qGMN7.1* was selected from BC<sub>4</sub>F<sub>2</sub> population by phenotyping and genotyping; (b) The genetic background of CSSL-*qGMN7.1*. Black bars represented the substitution segments from PA64s.

**Fig.S4**

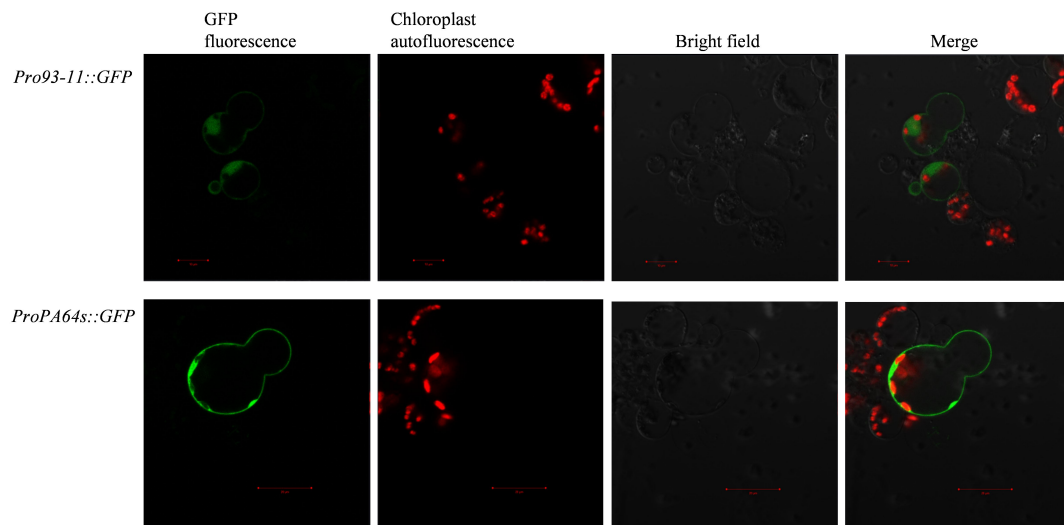

Fig.S4 Green fluorescent signals of GFP driven by 93-11 (up) and PA64s (down) promoter.
